# Supplementary material for: The Gustave Roussy Immune score (GRIm score) as a novel prognostic score for early breast cancer patients: A real-world retrospective study
Source: PubMed Central journal article supplement (PMC11539385; doi:10.7150/ijms.99724), 2024-10-14
Supplement: ijmsv21p2640s1.pdf [file ijmsv21p2640s1.pdf]

**A**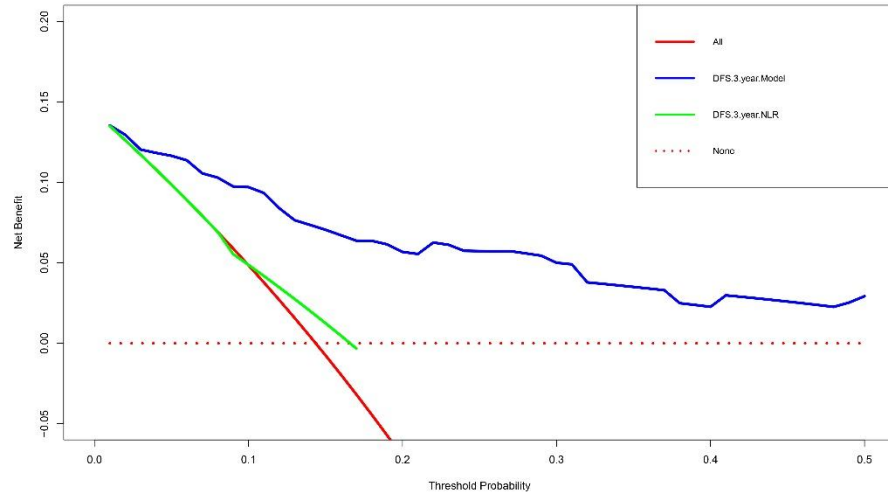**C**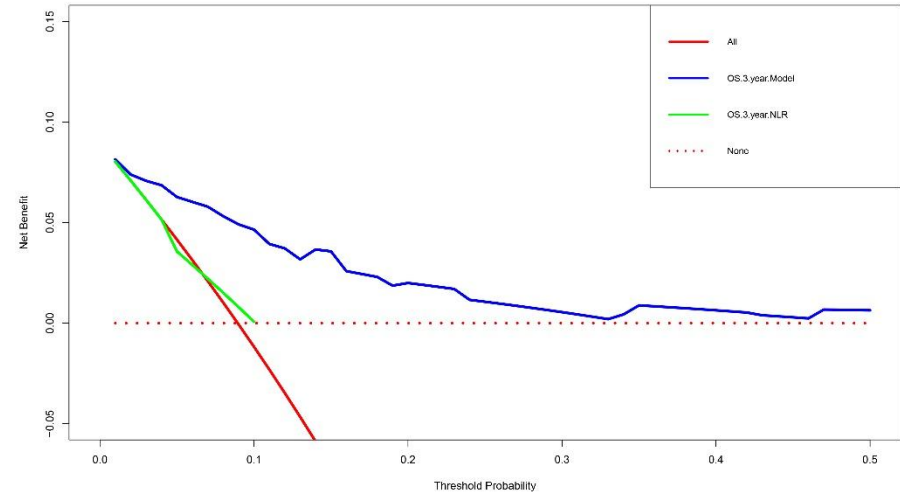**B**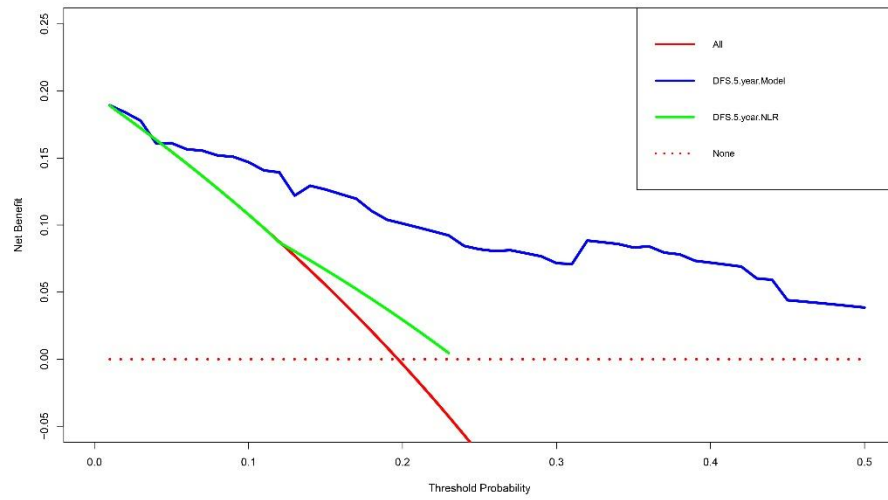**D**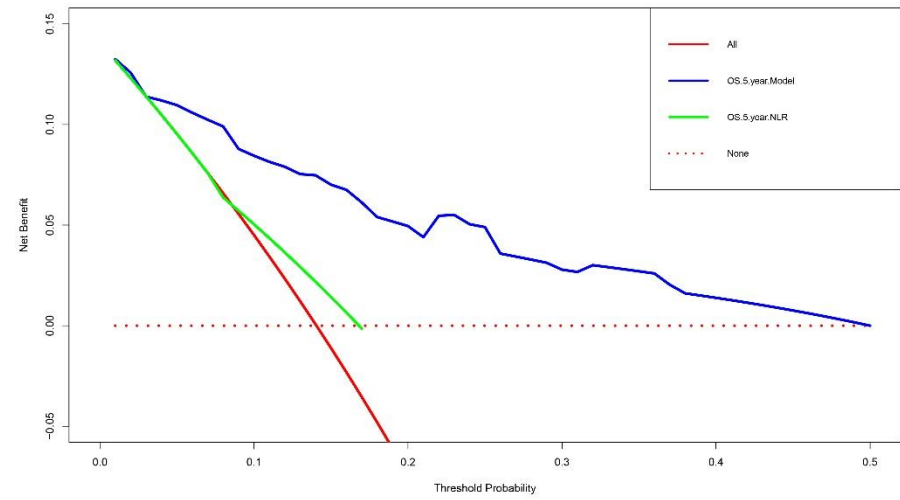

**Figure S1** Decision curve analyses (DCA) of nomogram and NLR prediction model for predicting the DFS and OS rates in 3- and 5-year. A) DCA of nomogram and GRIm score prediction model for predicting the DFS rates in 3-year; B) DCA of nomogram and GRIm score prediction model for predicting the DFS rates in 5-year; C) DCA of nomogram and GRIm score prediction model for predicting the OS rates in 3-year; D) DCA of nomogram and GRIm score prediction model for predicting the OS rates in 5-year.

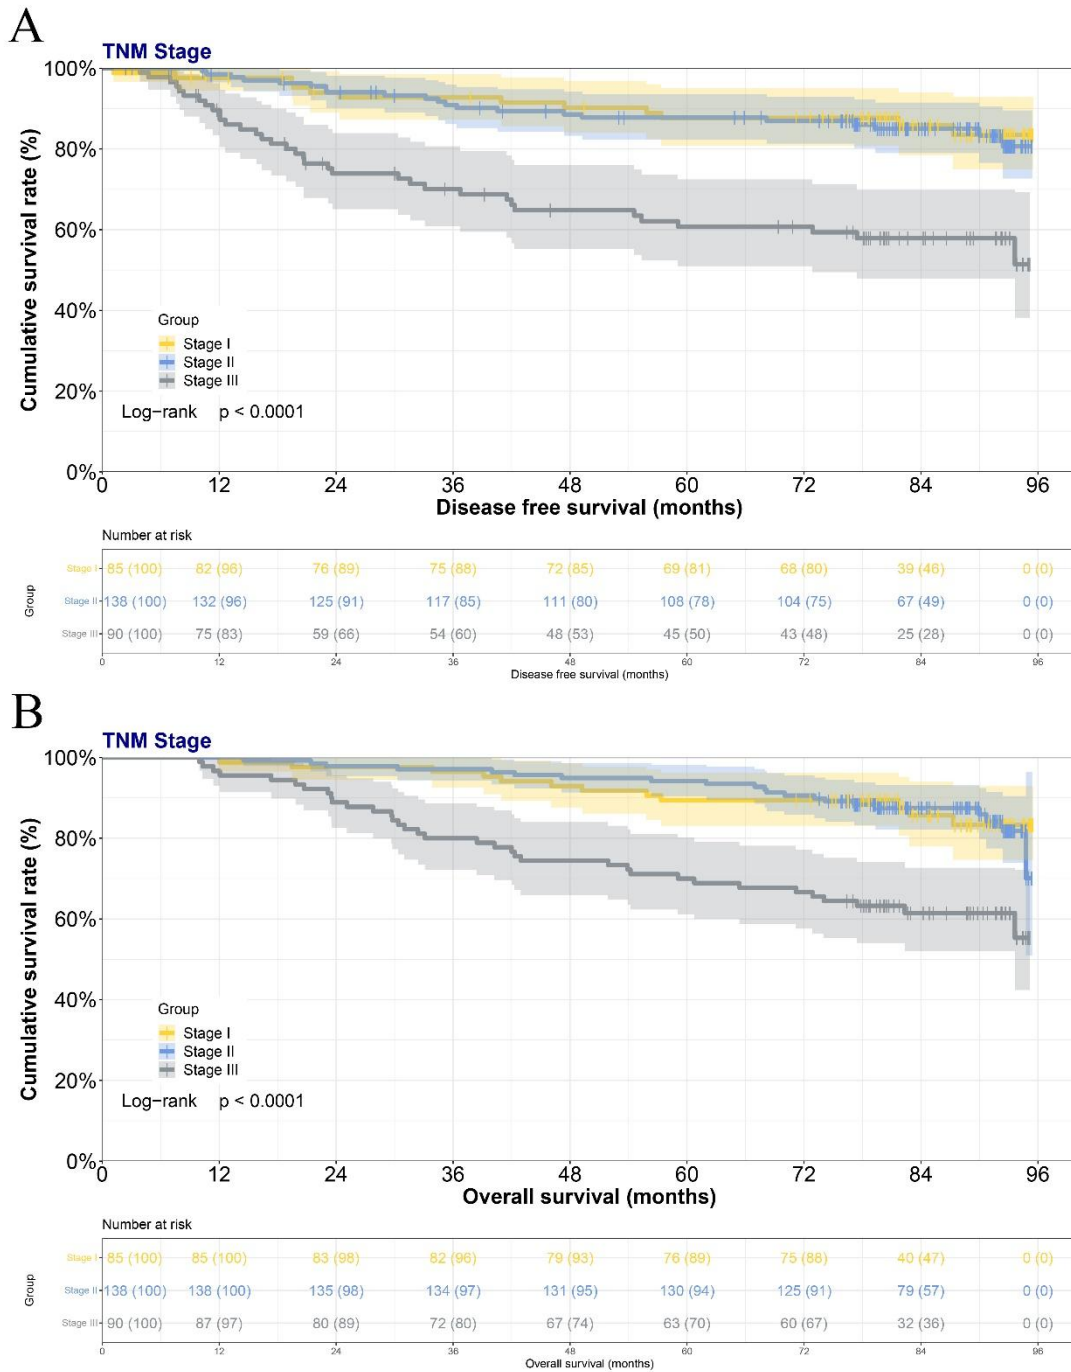

**Figure S2** The Kaplan-Meier survival curves illustrating the survival time among breast cancer patients, stratified based on the TNM stage. A) Kaplan-Meier survival curves illustrating the DFS among breast cancer patients, stratified based on the TNM stage; B) Kaplan-Meier survival curves illustrating the OS among breast cancer patients, stratified based on the TNM stage.

**Table S1** Correlation between GRIm score and organ metastasis

| Parameters             | level | Overall    | Low GRIm score | High GRIm score | p     |
|------------------------|-------|------------|----------------|-----------------|-------|
| n                      |       | 313        | 81             | 232             |       |
| Lung metastasis        | No    | 281 (89.8) | 74 (91.4)      | 207 (89.2)      | 0.739 |
|                        | Yes   | 32 (10.2)  | 7 (8.6)        | 25 (10.8)       |       |
| Bone metastasis        | No    | 273 (87.2) | 72 (88.9)      | 201 (86.6)      | 0.742 |
|                        | Yes   | 40 (12.8)  | 9 (11.1)       | 31 (13.4)       |       |
| Liver metastasis       | No    | 284 (90.7) | 74 (91.4)      | 210 (90.5)      | 0.998 |
|                        | Yes   | 29 (9.3)   | 7 (8.6)        | 22 (9.5)        |       |
| Mediastinal metastasis | No    | 299 (95.5) | 77 (95.1)      | 222 (95.7)      | 1.000 |
|                        | Yes   | 14 (4.5)   | 4 (4.9)        | 10 (4.3)        |       |
| Brain metastasis       | No    | 297 (94.9) | 77 (95.1)      | 220 (94.8)      | 1.000 |
|                        | Yes   | 16 (5.1)   | 4 (4.9)        | 12 (5.2)        |       |
| Pleural metastasis     | No    | 302 (96.5) | 78 (96.3)      | 224 (96.6)      | 1.000 |
|                        | Yes   | 11 (3.5)   | 3 (3.7)        | 8 (3.4)         |       |
| Chest wall metastasis  | No    | 301 (96.2) | 75 (92.6)      | 226 (97.4)      | 0.108 |
|                        | Yes   | 12 (3.8)   | 6 (7.4)        | 6 (2.6)         |       |
| Axillary metastasis    | No    | 154 (49.2) | 48 (59.3)      | 106 (45.7)      | 0.048 |
|                        | Yes   | 159 (50.8) | 33 (40.7)      | 126 (54.3)      |       |
| Clavicle metastasis    | No    | 264 (84.3) | 68 (84.0)      | 196 (84.5)      | 1.000 |
|                        | Yes   | 49 (15.7)  | 13 (16.0)      | 36 (15.5)       |       |

Abbreviation: GRIm score: Gustave Roussy Immune score.

**Table S2** Comparison of performance of TNM stage with common hematological parameters

| Parameters       | level  | Overall    | Stage I   | Stage II   | Stage III | p     |
|------------------|--------|------------|-----------|------------|-----------|-------|
| n                |        | 313        | 85        | 138        | 90        |       |
| GRIm score       | Low    | 81 (25.9)  | 25 (29.4) | 38 (27.5)  | 18 (20.0) | 0.305 |
|                  | High   | 232 (74.1) | 60 (70.6) | 100 (72.5) | 72 (80.0) |       |
| NLR              | Low    | 105 (33.5) | 29 (34.1) | 51 (37.0)  | 25 (27.8) | 0.354 |
|                  | High   | 208 (66.5) | 56 (65.9) | 87 (63.0)  | 65 (72.2) |       |
| ALT              | <21    | 142 (45.4) | 44 (51.8) | 60 (43.5)  | 38 (42.2) | 0.375 |
|                  | ≥21    | 171 (54.6) | 41 (48.2) | 78 (56.5)  | 52 (57.8) |       |
| AST              | <23    | 147 (47.0) | 41 (48.2) | 67 (48.6)  | 39 (43.3) | 0.715 |
|                  | ≥23    | 166 (53.0) | 44 (51.8) | 71 (51.4)  | 51 (56.7) |       |
| AST/ALT          | <1.44  | 155 (49.5) | 73 (85.9) | 117 (84.8) | 77 (85.6) | 0.972 |
|                  | ≥1.44  | 158 (50.5) | 12 (14.1) | 21 (15.2)  | 13 (14.4) |       |
| LDH              | <170   | 156 (49.8) | 52 (61.2) | 63 (45.7)  | 41 (45.6) | 0.050 |
|                  | ≥170   | 157 (50.2) | 33 (38.8) | 75 (54.3)  | 49 (54.4) |       |
| ALB              | <45    | 145 (46.3) | 41 (48.2) | 63 (45.7)  | 41 (45.6) | 0.918 |
|                  | ≥45    | 168 (53.7) | 44 (51.8) | 75 (54.3)  | 49 (54.4) |       |
| TBIL             | <12.45 | 156 (49.8) | 55 (64.7) | 66 (47.8)  | 35 (38.9) | 0.002 |
|                  | ≥12.45 | 157 (50.2) | 30 (35.3) | 72 (52.2)  | 55 (61.1) |       |
| CA153            | <9.82  | 156 (49.8) | 52 (61.2) | 74 (53.6)  | 30 (33.3) | 0.001 |
|                  | ≥9.82  | 157 (50.2) | 33 (38.8) | 64 (46.4)  | 60 (66.7) |       |
| CEA              | <1.49  | 156 (49.8) | 50 (58.8) | 74 (53.6)  | 32 (35.6) | 0.004 |
|                  | ≥1.49  | 157 (50.2) | 35 (41.2) | 64 (46.4)  | 58 (64.4) |       |
| D-D              | <0.25  | 151 (48.2) | 42 (49.4) | 69 (50.0)  | 40 (44.4) | 0.692 |
|                  | ≥0.25  | 162 (51.8) | 43 (50.6) | 69 (50.0)  | 50 (55.6) |       |
| FBG              | <2.6   | 153 (48.9) | 39 (45.9) | 69 (50.0)  | 45 (50.0) | 0.811 |
|                  | ≥2.6   | 160 (51.1) | 46 (54.1) | 69 (50.0)  | 45 (50.0) |       |
| White blood cell | <5.45  | 156 (49.8) | 50 (58.8) | 63 (45.7)  | 43 (47.8) | 0.145 |

|            |             |            |           |           |           |       |
|------------|-------------|------------|-----------|-----------|-----------|-------|
|            | $\geq 5.45$ | 157 (50.2) | 35 (41.2) | 75 (54.3) | 47 (52.2) |       |
| Neutrophil | $< 3.23$    | 155 (49.5) | 47 (55.3) | 67 (48.6) | 41 (45.6) | 0.417 |
|            | $\geq 3.23$ | 158 (50.5) | 38 (44.7) | 71 (51.4) | 49 (54.4) |       |
| Lymphocyte | $< 1.70$    | 154 (49.2) | 42 (49.4) | 62 (44.9) | 50 (55.6) | 0.292 |
|            | $\geq 1.70$ | 159 (50.8) | 43 (50.6) | 76 (55.1) | 40 (44.4) |       |
| Monocyte   | $< 0.35$    | 151 (48.2) | 47 (55.3) | 55 (39.9) | 49 (54.4) | 0.031 |
|            | $\geq 0.35$ | 162 (51.8) | 38 (44.7) | 83 (60.1) | 41 (45.6) |       |
| Platelet   | $< 233$     | 153 (48.9) | 40 (47.1) | 60 (43.5) | 53 (58.9) | 0.070 |
|            | $\geq 233$  | 160 (51.1) | 45 (52.9) | 78 (56.5) | 37 (41.1) |       |

Abbreviation: GRIm score: Gustave Roussy Immune score; NLR: neutrophil to lymphocyte ratio; ALT: alanine aminotransferase; AST: aspartate aminotransferase; LDH: lactate dehydrogenase; ALB: albumin; TBIL: total bilirubin; CA153: cancer antigen 153; CEA: carcinoembryonic antigen; D-D: D-Dimer; FBG: fibrinogen.

**Table S3** Comparison of prognostic effect of the GRIm score and its components by different TNM stage

| Parameters | level  | Stage I   |                |                 | p      | Stage II  |                |                 | p      | Stage III |                |                 | p      |
|------------|--------|-----------|----------------|-----------------|--------|-----------|----------------|-----------------|--------|-----------|----------------|-----------------|--------|
|            |        | Overall   | Low GRIm score | High GRIm score |        | Overall   | Low GRIm score | High GRIm score |        | Overall   | Low GRIm score | High GRIm score |        |
| n          |        | 85        | 25             | 60              |        | 138       | 38             | 100             |        | 90        | 18             | 72              |        |
| NLR        | Low    | 29 (34.1) | 25 (100.0)     | 4 (6.7)         | <0.001 | 51 (37.0) | 38 (100.0)     | 13 (13.0)       | <0.001 | 25 (27.8) | 17 (94.4)      | 8 (11.1)        | <0.001 |
|            | High   | 56 (65.9) | 0 (0.0)        | 56 (93.3)       |        | 87 (63.0) | 0 (0.0)        | 87 (87.0)       |        | 65 (72.2) | 1 (5.6)        | 64 (88.9)       |        |
| ALT        | <21    | 44 (51.8) | 13 (52.0)      | 31 (51.7)       | 1.000  | 60 (43.5) | 16 (42.1)      | 44 (44.0)       | 0.993  | 38 (42.2) | 4 (22.2)       | 34 (47.2)       | 0.098  |
|            | ≥21    | 41 (48.2) | 12 (48.0)      | 29 (48.3)       |        | 78 (56.5) | 22 (57.9)      | 56 (56.0)       |        | 52 (57.8) | 14 (77.8)      | 38 (52.8)       |        |
| AST        | <23    | 41 (48.2) | 10 (40.0)      | 31 (51.7)       | 0.458  | 67 (48.6) | 19 (50.0)      | 48 (48.0)       | 0.985  | 39 (43.3) | 7 (38.9)       | 32 (44.4)       | 0.873  |
|            | ≥23    | 44 (51.8) | 15 (60.0)      | 29 (48.3)       |        | 71 (51.4) | 19 (50.0)      | 52 (52.0)       |        | 51 (56.7) | 11 (61.1)      | 40 (55.6)       |        |
| AST/ALT    | <1.1   | 38 (44.7) | 13 (52.0)      | 25 (41.7)       | 0.526  | 70 (50.7) | 20 (52.6)      | 50 (50.0)       | 0.932  | 47 (52.2) | 13 (72.2)      | 34 (47.2)       | 0.102  |
|            | ≥1.1   | 47 (55.3) | 12 (48.0)      | 35 (58.3)       |        | 68 (49.3) | 18 (47.4)      | 50 (50.0)       |        | 43 (47.8) | 5 (27.8)       | 38 (52.8)       |        |
| LDH        | <170   | 52 (61.2) | 13 (52.0)      | 39 (65.0)       | 0.381  | 63 (45.7) | 16 (42.1)      | 47 (47.0)       | 0.746  | 41 (45.6) | 9 (50.0)       | 32 (44.4)       | 0.874  |
|            | ≥170   | 33 (38.8) | 12 (48.0)      | 21 (35.0)       |        | 75 (54.3) | 22 (57.9)      | 53 (53.0)       |        | 49 (54.4) | 9 (50.0)       | 40 (55.6)       |        |
| ALB        | <45    | 41 (48.2) | 12 (48.0)      | 29 (48.3)       | 1.000  | 63 (45.7) | 20 (52.6)      | 43 (43.0)       | 0.410  | 41 (45.6) | 11 (61.1)      | 30 (41.7)       | 0.224  |
|            | ≥45    | 44 (51.8) | 13 (52.0)      | 31 (51.7)       |        | 75 (54.3) | 18 (47.4)      | 57 (57.0)       |        | 49 (54.4) | 7 (38.9)       | 42 (58.3)       |        |
| TBIL       | <12.45 | 55 (64.7) | 16 (64.0)      | 39 (65.0)       | 1.000  | 66 (47.8) | 21 (55.3)      | 45 (45.0)       | 0.375  | 35 (38.9) | 7 (38.9)       | 28 (38.9)       | 1.000  |
|            | ≥12.45 | 30 (35.3) | 9 (36.0)       | 21 (35.0)       |        | 72 (52.2) | 17 (44.7)      | 55 (55.0)       |        | 55 (61.1) | 11 (61.1)      | 44 (61.1)       |        |
| CA153      | <9.82  | 52 (61.2) | 16 (64.0)      | 36 (60.0)       | 0.920  | 74 (53.6) | 22 (57.9)      | 52 (52.0)       | 0.668  | 30 (33.3) | 6 (33.3)       | 24 (33.3)       | 1.000  |
|            | ≥9.82  | 33 (38.8) | 9 (36.0)       | 24 (40.0)       |        | 64 (46.4) | 16 (42.1)      | 48 (48.0)       |        | 60 (66.7) | 12 (66.7)      | 48 (66.7)       |        |
| CEA        | <1.49  | 50 (58.8) | 14 (56.0)      | 36 (60.0)       | 0.921  | 74 (53.6) | 17 (44.7)      | 57 (57.0)       | 0.272  | 32 (35.6) | 4 (22.2)       | 28 (38.9)       | 0.296  |
|            | ≥1.49  | 35 (41.2) | 11 (44.0)      | 24 (40.0)       |        | 64 (46.4) | 21 (55.3)      | 43 (43.0)       |        | 58 (64.4) | 14 (77.8)      | 44 (61.1)       |        |
| D-D        | <0.25  | 42 (49.4) | 15 (60.0)      | 27 (45.0)       | 0.307  | 69 (50.0) | 17 (44.7)      | 52 (52.0)       | 0.568  | 40 (44.4) | 9 (50.0)       | 31 (43.1)       | 0.791  |
|            | ≥0.25  | 43 (50.6) | 10 (40.0)      | 33 (55.0)       |        | 69 (50.0) | 21 (55.3)      | 48 (48.0)       |        | 50 (55.6) | 9 (50.0)       | 41 (56.9)       |        |
| FBG        | <2.6   | 39 (45.9) | 15 (60.0)      | 24 (40.0)       | 0.148  | 69 (50.0) | 22 (57.9)      | 47 (47.0)       | 0.341  | 45 (50.0) | 11 (61.1)      | 34 (47.2)       | 0.429  |

|                  |       |           |           |           |        |           |           |           |        |           |           |           |       |
|------------------|-------|-----------|-----------|-----------|--------|-----------|-----------|-----------|--------|-----------|-----------|-----------|-------|
|                  | ≥2.6  | 46 (54.1) | 10 (40.0) | 36 (60.0) |        | 69 (50.0) | 16 (42.1) | 53 (53.0) |        | 45 (50.0) | 7 (38.9)  | 38 (52.8) |       |
| White blood cell | <5.45 | 50 (58.8) | 17 (68.0) | 33 (55.0) | 0.386  | 63 (45.7) | 28 (73.7) | 35 (35.0) | <0.001 | 43 (47.8) | 8 (44.4)  | 35 (48.6) | 0.958 |
|                  | ≥5.45 | 35 (41.2) | 8 (32.0)  | 27 (45.0) |        | 75 (54.3) | 10 (26.3) | 65 (65.0) |        | 47 (52.2) | 10 (55.6) | 37 (51.4) |       |
| Neutrophil       | <3.23 | 47 (55.3) | 21 (84.0) | 26 (43.3) | 0.001  | 67 (48.6) | 32 (84.2) | 35 (35.0) | <0.001 | 41 (45.6) | 15 (83.3) | 26 (36.1) | 0.001 |
|                  | ≥3.23 | 38 (44.7) | 4 (16.0)  | 34 (56.7) |        | 71 (51.4) | 6 (15.8)  | 65 (65.0) |        | 49 (54.4) | 3 (16.7)  | 46 (63.9) |       |
| Lymphocyte       | <1.70 | 42 (49.4) | 4 (16.0)  | 38 (63.3) | <0.001 | 62 (44.9) | 10 (26.3) | 52 (52.0) | 0.012  | 50 (55.6) | 5 (27.8)  | 45 (62.5) | 0.017 |
|                  | ≥1.70 | 43 (50.6) | 21 (84.0) | 22 (36.7) |        | 76 (55.1) | 28 (73.7) | 48 (48.0) |        | 40 (44.4) | 13 (72.2) | 27 (37.5) |       |
| Monocyte         | <0.35 | 47 (55.3) | 13 (52.0) | 34 (56.7) | 0.877  | 55 (39.9) | 21 (55.3) | 34 (34.0) | 0.037  | 49 (54.4) | 14 (77.8) | 35 (48.6) | 0.050 |
|                  | ≥0.35 | 38 (44.7) | 12 (48.0) | 26 (43.3) |        | 83 (60.1) | 17 (44.7) | 66 (66.0) |        | 41 (45.6) | 4 (22.2)  | 37 (51.4) |       |
| Platelet         | <233  | 40 (47.1) | 13 (52.0) | 27 (45.0) | 0.726  | 60 (43.5) | 15 (39.5) | 45 (45.0) | 0.694  | 53 (58.9) | 9 (50.0)  | 44 (61.1) | 0.556 |
|                  | ≥233  | 45 (52.9) | 12 (48.0) | 33 (55.0) |        | 78 (56.5) | 23 (60.5) | 55 (55.0) |        | 37 (41.1) | 9 (50.0)  | 28 (38.9) |       |

Abbreviation: GRIm score: Gustave Roussy Immune score; NLR: neutrophil to lymphocyte ratio; ALT: alanine aminotransferase; AST: aspartate aminotransferase; LDH: lactate dehydrogenase; ALB: albumin; TBIL: total bilirubin; CA153: cancer antigen 153; CEA: carcinoembryonic antigen; D-D: D-Dimer; FBG: fibrinogen.
